# Supplementary material for: Structural and photophysical properties of rare-earth complexes encapsulated into surface modified mesoporous silica nanoparticles
Source: Royal Society of Chemistry journal article supplement (doi:10.1039/c4dt00760c), 2014-05-06
Supplement: c4dt00760c1.pdf [file c4dt00760c1.pdf]

## Electronic supplementary information

### Structural and photo-physical properties of rare-earth complexes encapsulated into surface modified mesoporous silica nanoparticles

Chandrashekar Malba, Umayal Sudhakaran, Silvia Borsacchi, Marco Geppi\*, Francesco Enrichi, Marta Natile, Lidia Armelao, Tiziano Finotto, Riccardo Marin, Pietro Riello and Alvisè Benedetti\*

#### Content:

**Figure S1:** Rietveld refinement performed on the Eu(dbm)<sub>3</sub>phen diffractogram.

**Figure S2:** Rietveld refinement performed on the Y(dbm)<sub>3</sub>phen diffractogram.

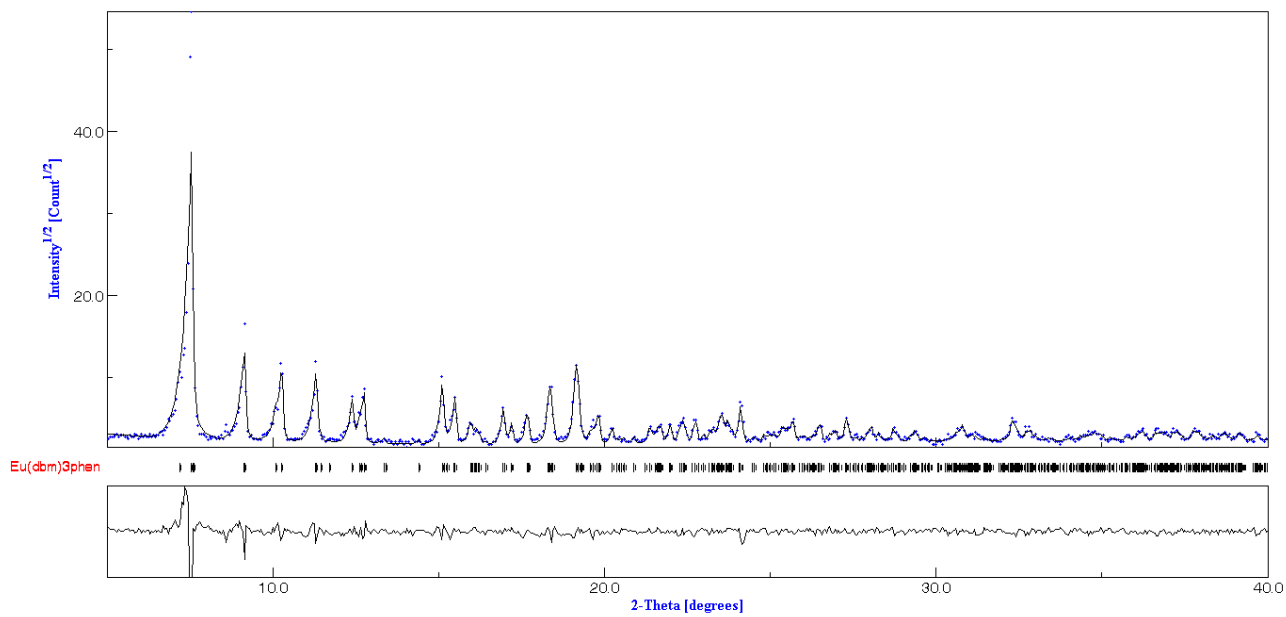

**Figure S1:** Rietveld refinement performed on the Eu(dbm)3phen diffractogram.

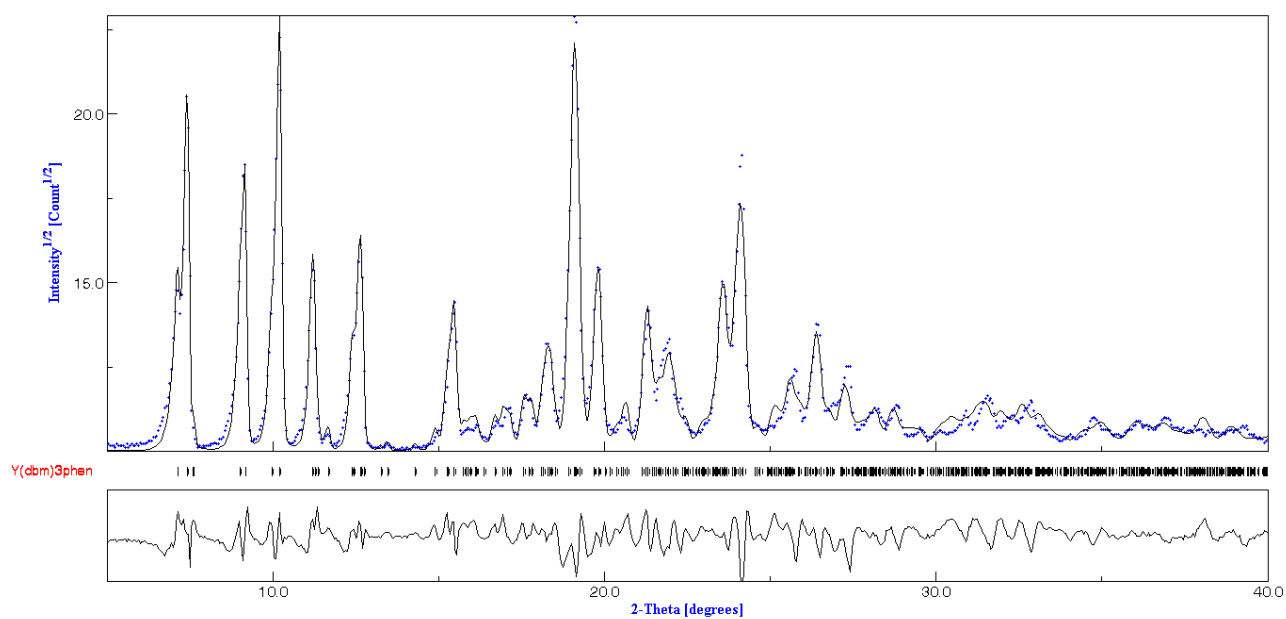

**Figure S2:** Rietveld refinement performed on the Y(dbm)3phen diffractogram.
